# Supplementary material
Source: HighWire-hosted journal article supplement (doi:10.1101/rna.079837.123)
Supplement: Supplemental_Legends.docx [file Supplemental_Legends.docx]

**Supplementary Figure 1.** **(A)** Violin plot for HART ratio in HCT116 degron cells analyzed with flow cytometry for the experiment in Fig. 1E. HCT116 degron cells were lentivirally transduced with HART constructs with various 5′ UTRs in front of mCherry. After 48 hours from the addition of either DMSO or auxin, which induces degradation of endogenous DDX3X, the fluorescent signal was measured by fluorescent cytometry. The HART ratio (mCherry/eGFP) was calculated for each cell and plotted as a violin plot. Data was obtained in three separate experiments for a total of 9 replicates. (**B**) Same data as in S1A presented as a boxplot. The HART ratio was calculated for each cell and averaged across replicate wells. Data was obtained in three separate experiments for a total of 9 replicates. Statistical significance was determined by unpaired *t*-test: ns: p > 0.05, *: p <= 0.05, **: p <= 0.01, ***: p <= 0.001, ****: p <= 0.0001. **(C)** Flow cytometry data for the mCherry channel for experiment in Fig. 1B. The raw data for the 561nm 50mW laser, YG C detector (corresponding to mCherry) for each cell was plotted and the mean was calculated and plotted as a vertical line. **(D)** Flow cytometry data for the eGFP channel for cells in Fig. 1B. The raw data for the 488nm 60mW laser, Blue C detector (corresponding to eGFP) for each cell was plotted and the mean was calculated and plotted as a vertical line. **(E)** HART ratio in cells containing an 83 nt control 5′ UTR. HCT116 degron cells were lentivirally transduced with HART constructs with indicated 5′ UTRs upstream of mCherry and a 83 nt 5′ UTR upstream of eGFP. After 48 hours from the addition of either DMSO or auxin, which induces degradation of endogenous DDX3X, the fluorescent signal of cells was measured by fluorescent cytometry. The HART ratio (mCherry/eGFP) was calculated for each cell and averaged across replicate wells. Data was obtained in two separate experiments for a total of 8 replicates. Statistical significance was determined by unpaired *t*-test: ns: p > 0.05, *: p <= 0.05, **: p <= 0.01, ***: p <= 0.001, ****: p <= 0.0001. **(F)** Same data as E, normalized to DMSO for each reporter. **(G)** Gating strategy for HART. Cells were gated using SSC and FSC to obtain single cells and remove doublets, and subsequently through the use of eGFP and mCherry channels to obtain cells that were double positive. **(H)** Example flow cytometry data for DMSO treated HART cells. The right panel presents a density plot for cells while the left panel presents a histogram plot with the HART ratio on the X axis. **(I)** Example flow cytometry data for AUX treated HART cells. The right panel presents a density plot for cells while the left panel presents a histogram plot with the HART ratio on the X axis. Both the density and the histogram plots of AUX-treated cell present a shift towards lower HART ratios compared to DMSO-treated cells in Fig. S1H. **(J)** Example microscopy images for DMSO-treated cells from Fig. 1F. HART infected cells were plated in a 384-well format, treated with DMSO for 48 hours, and stained for DAPI, eGFP, and mCherry, and imaged. **(K**) Example flow cytometry data for AUX treated HART cells **(J)** Example microscopy images for DMSO-treated cells from Fig. 1F. HART infected cells were plated in a 384-well format, treated with auxin for 48 hours, and stained for DAPI, eGFP, and mCherry, and imaged.

**Supplementary Figure 2 (A)** SHAPE-MaP reactivity for the 5′ UTR of ODC1 *in vitro* from Fig. 2C. *In vitro* transcribed mRNA containing the 5′ UTR of ODC1 and the open reading frame of luciferase was probed with 200 mM NAI or DMSO control for SHAPE-MaP. The RNA was reverse transcribed and sequenced. The SHAPE reactivity was calculated based on the difference in mutation rate.  **(B)** SHAPE-MaP reactivity and mutation rate for the 5′ UTR of RAC1 *in cell*. Cells were treated with 300 mM NAI in PBS or control for 20 min before quenching the reaction and extracting the RNA. The RNA was reverse transcribed, sequenced, and analyzed to obtain mutation profiles and SHAPE reactivity with the ShapeMapper tool. **(C)** Diagram of the structure of the RAC1 5′ UTR *in cell*, based on data from Fig. S2A and computed with ShapeMapper 2.1.3. (Busan & Weeks, 2018) **(D-E)** RNA folding minimum free energy prediction of the structures of the 5′ UTRs of RAC1 (C) and ODC1 (D) using the ViennaRNA Package (Lorenz et al., 2011). The minimum free energy for the RAC1 structure is -97.20 kcal/mol and for the ODC1 is -251.70 kcal/mol.

**Supplementary Figure 3 (A-E)** RNA folding minimum free energy prediction of the structures of the 5′ UTR of RAC1 containing the deletions used in Fig. 3 B-C using the ViennaRNA Package (Lorenz et al., 2011). The predicted minimum free energies for the RAC1 deletion constructs are: -77.20 kcal/mol for Δ1-39 (A), -69.60 kcal/mol for Δ40-78 (B), -76.00 kcal/mol for Δ79-117 (C), -82.40 kcal/mol for Δ118-157 (D), -74.00 kcal/mol for Δ158-197 (E). **(F-J)** RNA folding minimum free energy prediction of the structures of the 5′ UTR of ODC1 containing the deletions used in Fig. 3 B-C using the ViennaRNA Package (Lorenz et al., 2011). The predicted minimum free energies for the ODC1 deletion constructs are: -186.20 kcal/mol for Δ1-102 (F), -197.80 kcal/mol for Δ103-204 (G), -184.20 kcal/mol for Δ205-306 (H), -200.30 kcal/mol for Δ307-408 (I), -225.30 kcal/mol for Δ409-511 (J).

**Supplementary Figure 4 (A)** Comparison of eIF4E-binding-like motifs. The consensus eIF4E interacting protein motif is compared to the motifs found in 4EBP1 and in DDX3X **(B)** 15N HSQC spectrum for m7G bound eIF4E (in red) alone. **(C)** HSQC spectra of m7G bound eIF4E alone (in red) and with the addition of 1mM 4EBP1 peptide (blue) **(D)** HSQC spectra of m7G bound eIF4E alone (in red) and with the addition of 1 mM DDX3X peptide (green). **(E)** Immunofluorescence for DDX3X WT and mutants. Images are representative of N > 10 cells. HEK 293T cells were transduced with DDX3X-FLAG construct, fixed, and stained for anti-DDX3X and the nuclear marker DRAQ7 (Fig. 4G).

**Supplementary Figure 5 (A)** Violin plot for HART ratio in HART-ODC1 HCT116 degron cells analyzed with flow cytometry for the experiment in Fig. 5A. **(B)** Violin plot for HART ratio in HART-ODC1 HCT116 degron cells analyzed with flow cytometry for the experiment in Fig. 5B. **(C)** Western blot and band quantification for the cells from Fig. 5A with staining against actin, DDX3X, and FLAG. Degron-tagged endogenous DDX3X and transduced exogenous DDX3X possess the same size, hence the appearance of a single band which is double the size for the transduced samples. (**D**)Cell growth curves for DDX3X variants. HCT116 degron cells where lentivirally transduced with exogenous DDX3X WT and mutants.Auxin was added to induce loss of endogenous DDX3X and cell number was measured over time with CellTiter Glo.
